# Supplementary material for: CsCu2I3 thin films prepared by different deposition methods for ultraviolet photodetectors with imaging capability
Source: Royal Society of Chemistry journal article supplement (doi:10.1039/d3tc01824e), 2023-01-01
Supplement: d3tc01824e1.pdf [file d3tc01824e1.pdf]

# **CsCu<sub>2</sub>I<sub>3</sub> Thin Films Prepared by Different Deposition Methods for Ultraviolet Photodetectors with Imaging Capability**

Xiaoxuan Li<sup>a‡</sup>, Bin Xia<sup>a‡</sup>, Lichun Zhang<sup>ab\*</sup>, Feifei Wang<sup>a</sup>, Fengzhou Zhao<sup>a\*</sup>

*a School of Physics and Optoelectronic Engineering, Ludong University, Yantai, 264025, China*

*b School of integrated circuits, Ludong University, Yantai, 264025, China*

---

\* Corresponding author.

*Email-address: phyzlc@163.com*

*Email-address: fz Zhao@ustc.edu*

‡ These authors contributed equally.

## Theoretical details

The Vienna ab-initio simulation package (VASP) 6.1.2 code with the projector-augmented-wave (PAW) potential are adopted to perform the first-principles calculations. The HSE06 hybrid functional is put to use in the calculations of the electronic properties for the dielectric function. There are 24 atoms in the unit cell. The  $3 \times 3 \times 3$   $\Gamma$ -centered  $k$ -mesh of Brillouin zone (BZ) are employed in integration, but the band structure are calculated with additional 8 special  $k$  points including 140 points. The energy cutoff of the plane-wave basis sets is 500 eV to ensure the calculations to reach convergence. The energy convergent criterion is  $10^{-6}$  eV. In the relaxation calculation, all the force is smaller than 0.01 eV/Å for the equilibrium structures. By using the obtained  $\varepsilon(\omega)$ , we evaluate the optical absorption coefficient  $\alpha$  with an equation as follows:

$$\alpha(\omega) = \sqrt{2}\omega \sqrt{(\varepsilon_r^2(\omega) + \varepsilon_i^2(\omega))^{0.5} - \varepsilon_r(\omega)}$$

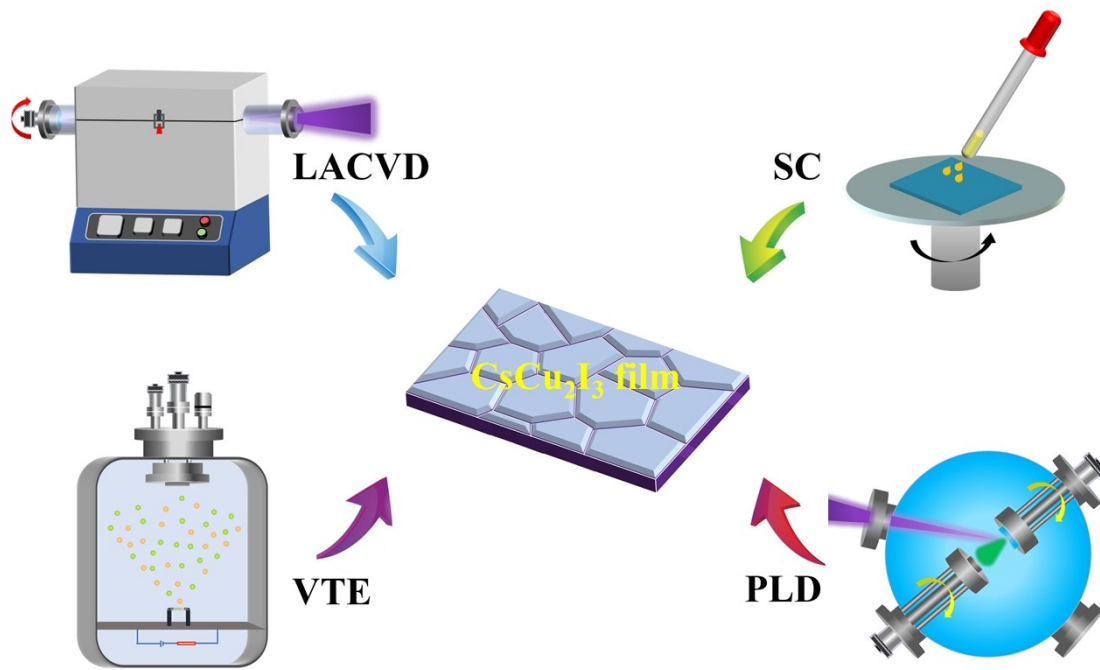

**Fig. S1** Schematic diagram for the fabrication of  $\text{CsCu}_2\text{I}_3$  films by LACVD, SC, VTE and PLD

utilized in this work.

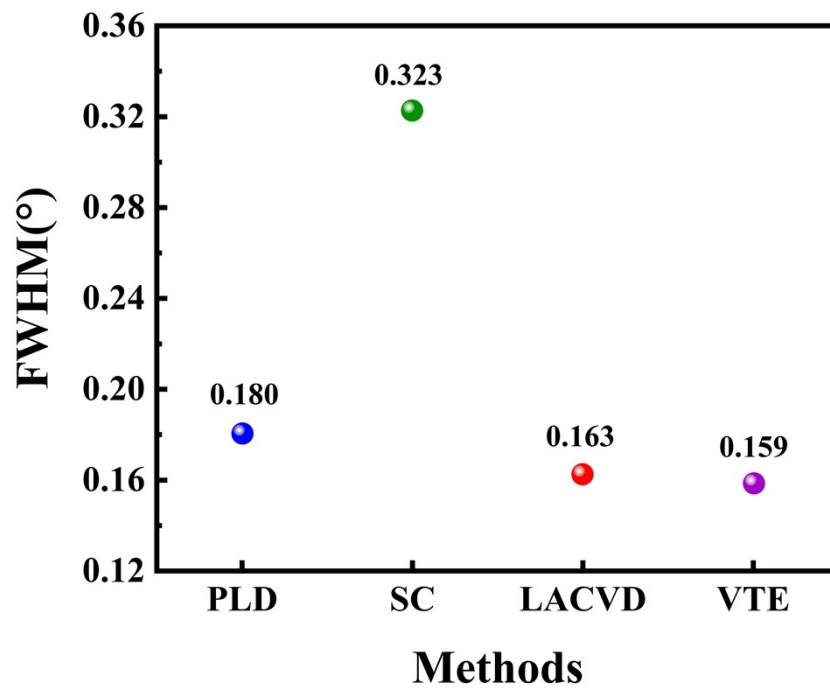

Fig. S2 FWHM of CsCu<sub>2</sub>I<sub>3</sub> films by LACVD, SC, VTE and PLD.

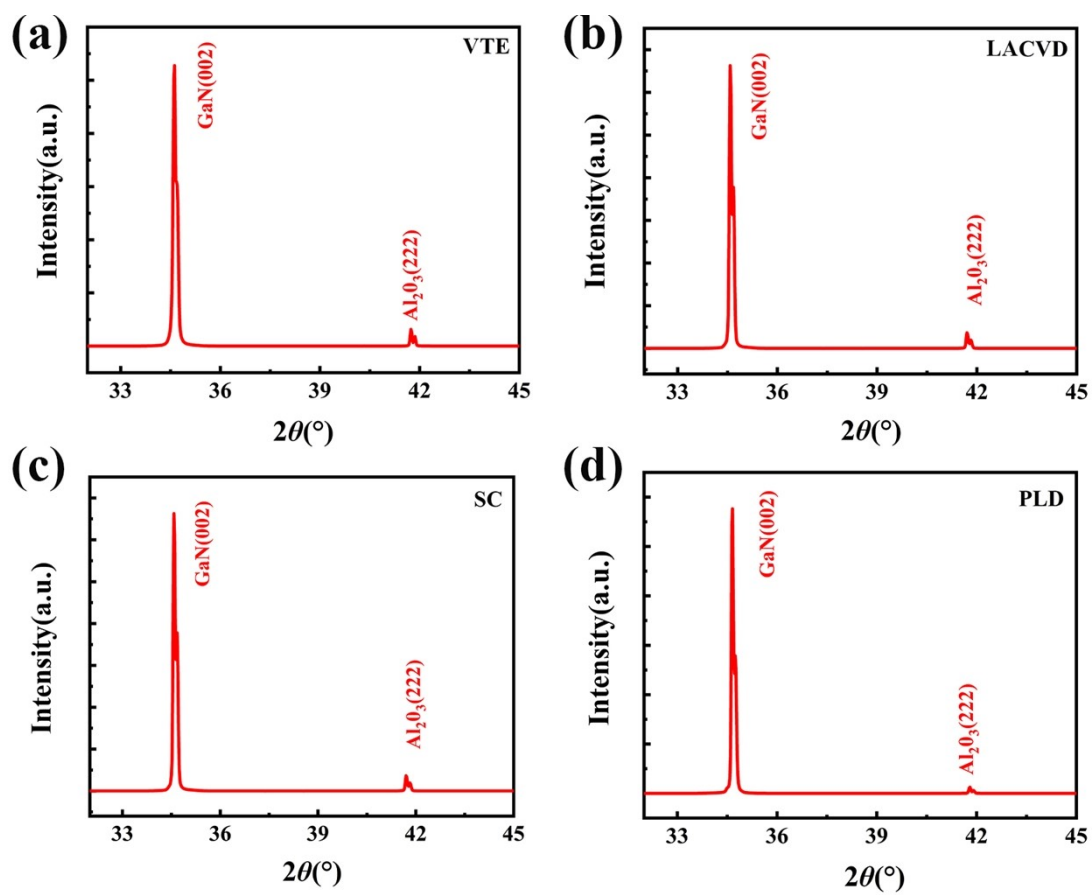

Fig. S3 XRD patterns of  $\text{CsCu}_2\text{I}_3/\text{GaN}$  ( $32^{\circ}$ - $45^{\circ}$ ).

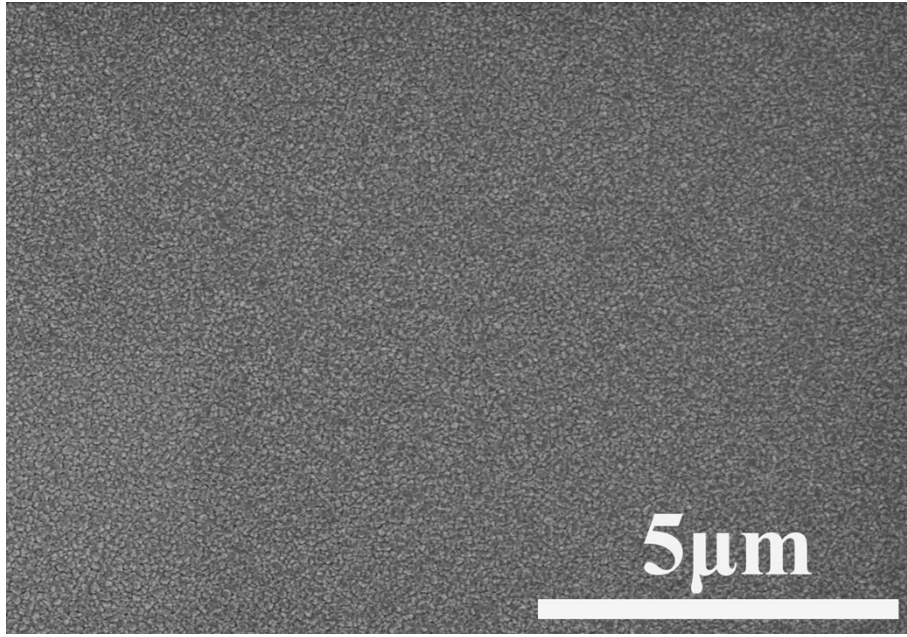

**Fig. S4** SEM image of large-area films prepared by VTE.

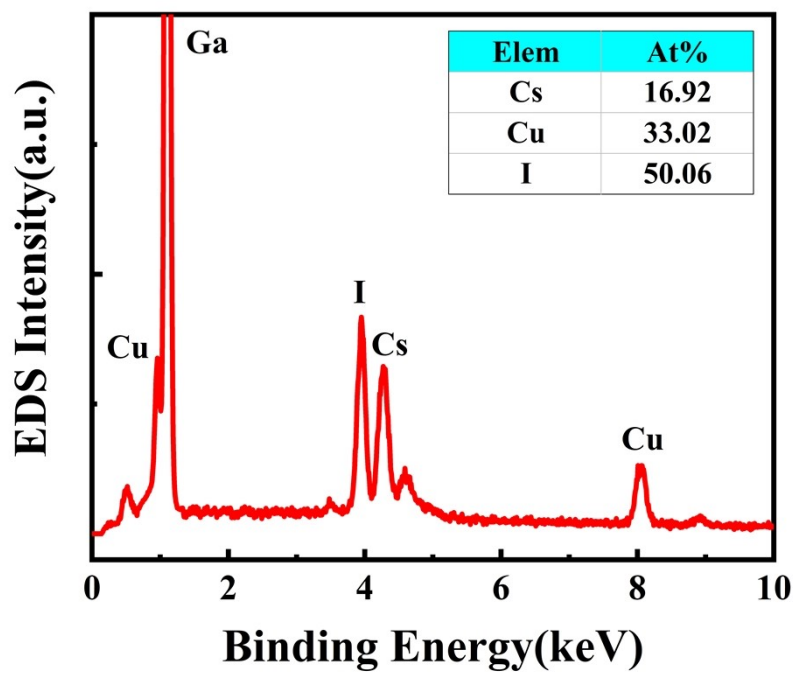

Fig. S5 EDS spectrum of CsCu<sub>2</sub>I<sub>3</sub> film prepared by VTE.

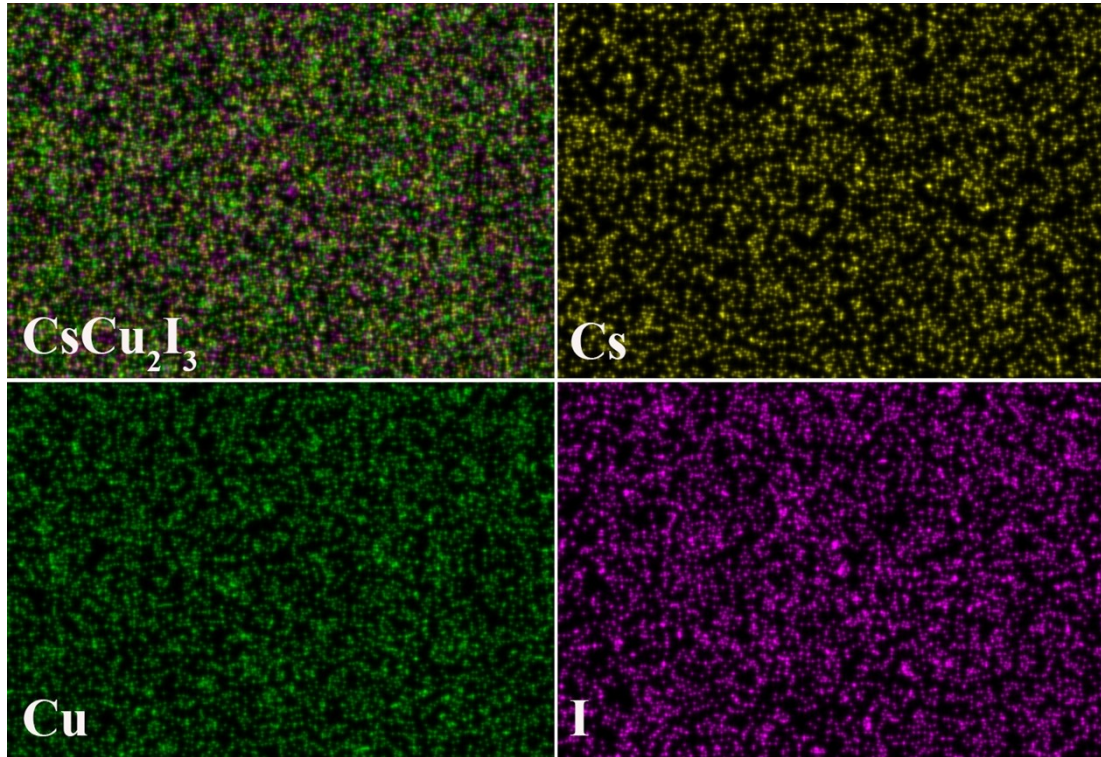

**Fig. S6** Elemental mapping of CsCu<sub>2</sub>I<sub>3</sub> film prepared by VTE.



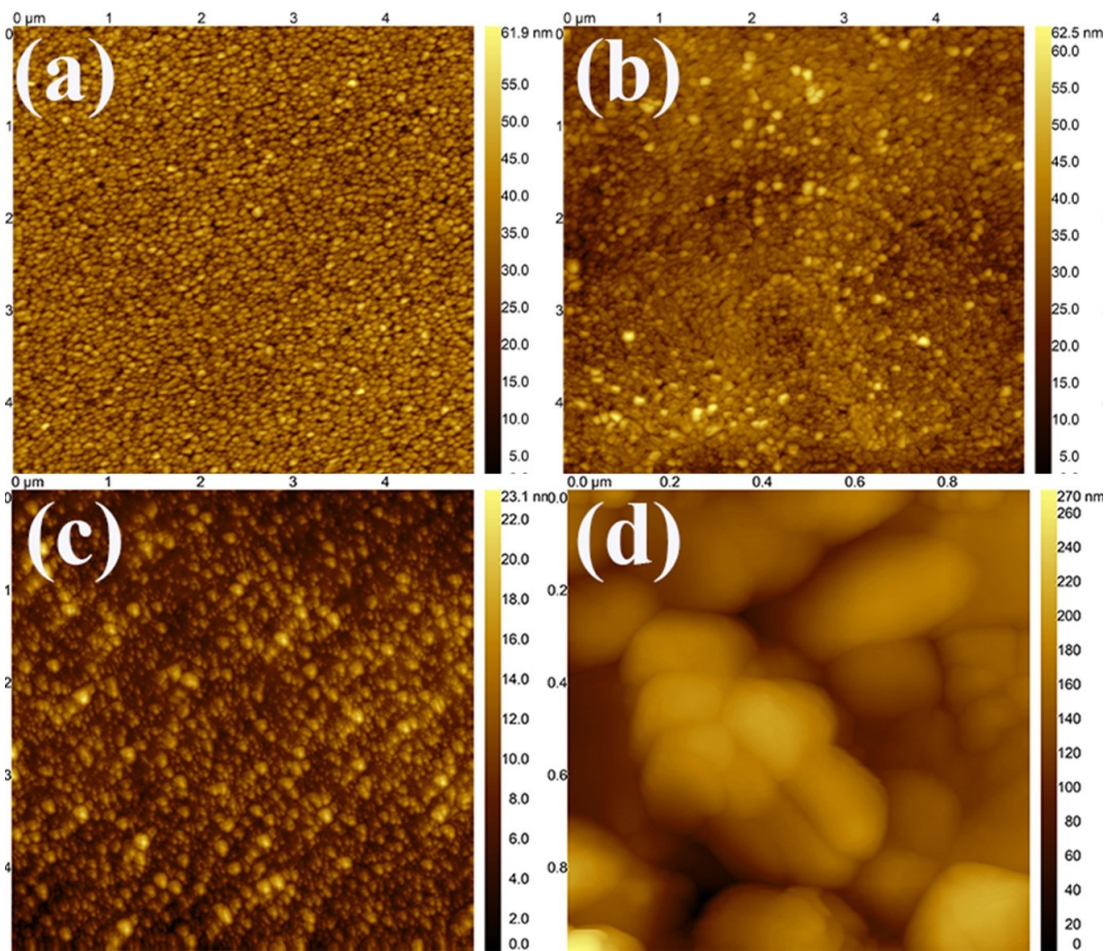

**Fig. S7** AFM images of  $\text{CsCu}_2\text{I}_3$  films prepared by PLD, VTE, LACVD and SC.

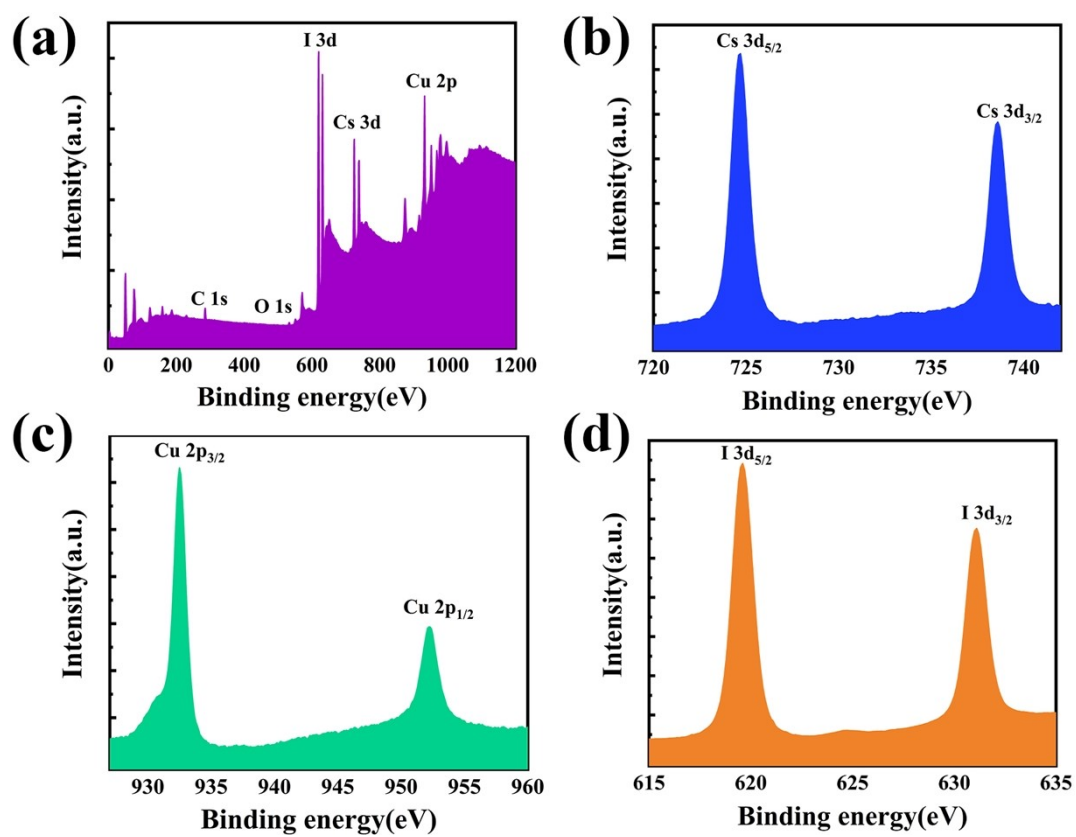

Fig. S8 XPS spectra of CsCu<sub>2</sub>I<sub>3</sub> film prepared by VTE: (a) total spectrum, (b) Cs 3d (c) Cu 2p (d)

I 3d.

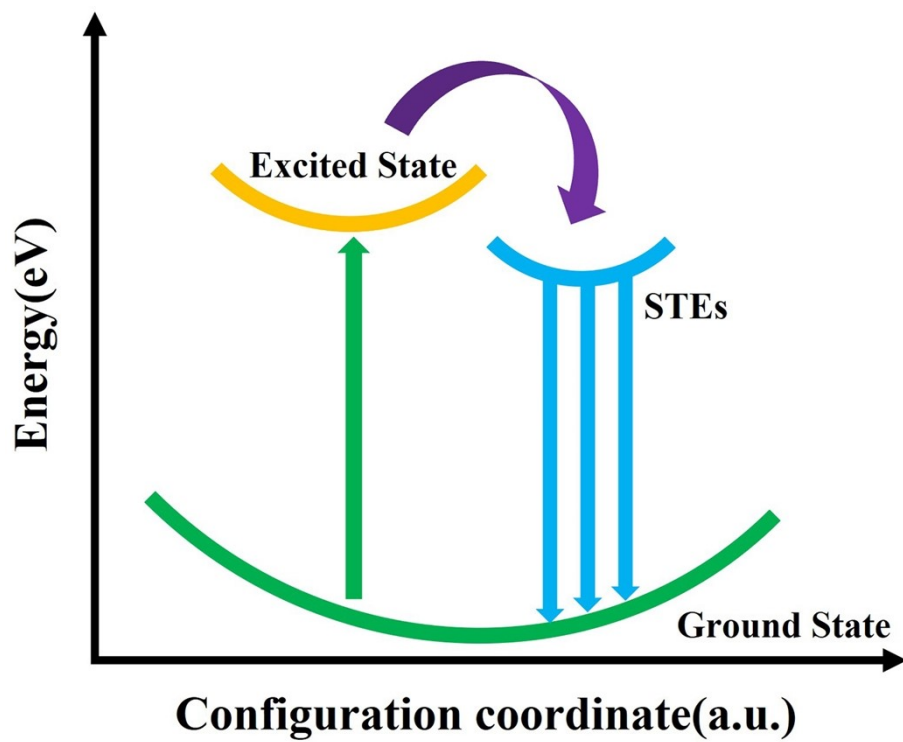

Fig. S9 Self-trapped exciton effect of CsCu<sub>2</sub>I<sub>3</sub>.

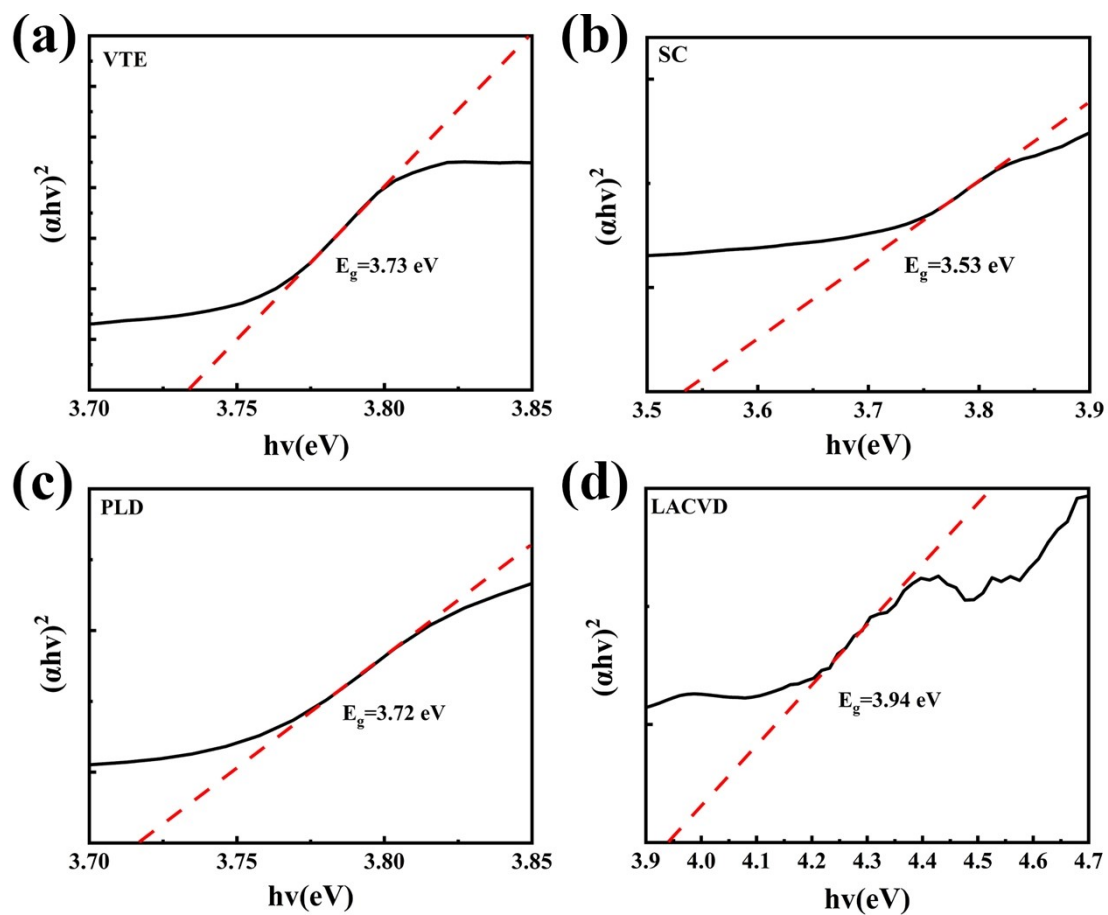

**Fig. S10** Optical band gap of  $\text{CsCu}_2\text{I}_3$  films prepared by PLD, VTE, LACVD and SC.

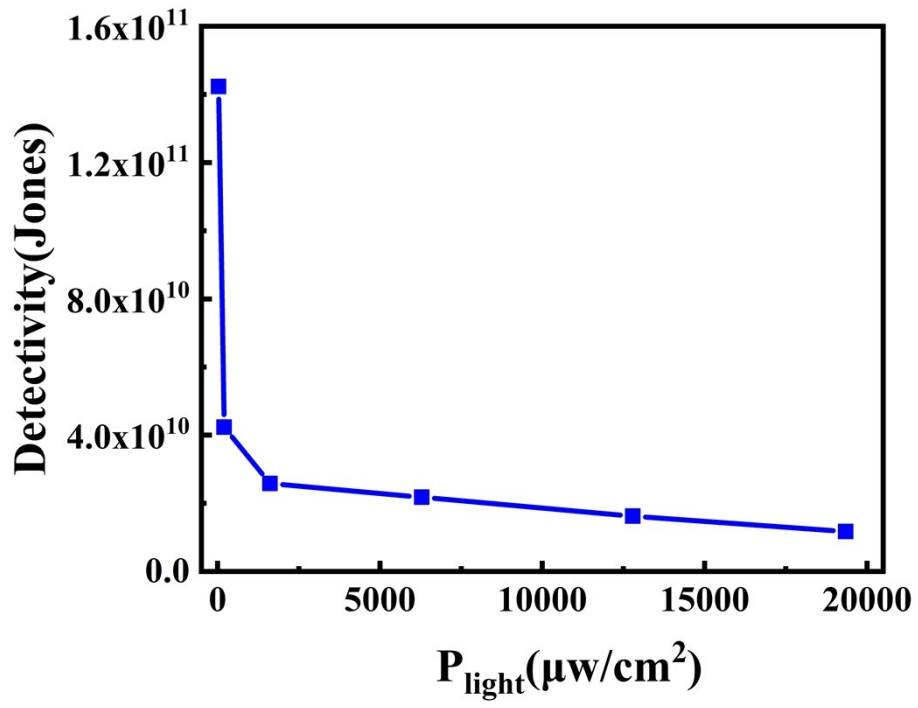

Fig. S11 Detectivity of photodetector under different light intensity prepared by VTE.

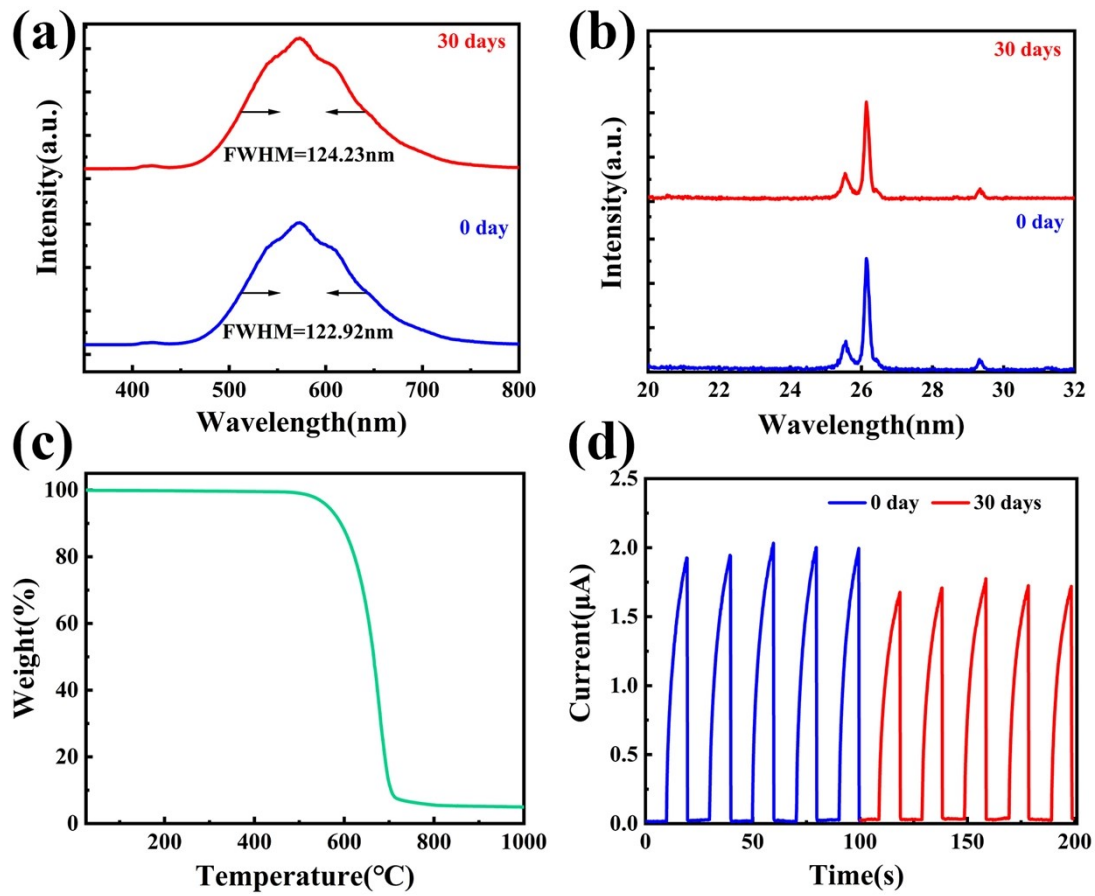

**Fig. S12** (a) PL stability and (b) Structural stability of CsCu<sub>2</sub>I<sub>3</sub> film for 30 days storage in air, (c)

Thermal stability of CsCu<sub>2</sub>I<sub>3</sub> film, (d) long-term storage stability of the CsCu<sub>2</sub>I<sub>3</sub>/GaN

heterojunction photodetector.

**Table S1.** Preparation parameters for different methods.

| Preparation<br>Methods | Substrate | Substrate   | Annealing | Laser      | Base               |
|------------------------|-----------|-------------|-----------|------------|--------------------|
|                        | Substrate | Temperature | Treatment | Parameters | Pressure           |
|                        |           | (°C)        | (°C, min) | (mJ, Hz )  | (Pa)               |
| PLD                    | n-GaN     | 200         | —         | 200, 5     | $1 \times 10^{-6}$ |
| VTE                    | n-GaN     | 200         | —         | —          | $3 \times 10^{-4}$ |
| LACVD                  | n-GaN     | 200         | —         | 200, 5     | 0                  |
| SC                     | n-GaN     | —           | 200°C, 60 | —          | $1 \times 10^5$    |

**Table S2.** Performance comparisons of perovskites ultraviolet photodetector.

| Preparation Technology | Device Structure                                                                                    | Wavelength (nm) | R (A W <sup>-1</sup> ) | D* (×10 <sup>12</sup> Jones) | Bias (V) | On/off ratio        | Ref. |
|------------------------|-----------------------------------------------------------------------------------------------------|-----------------|------------------------|------------------------------|----------|---------------------|------|
| Antisolvent            | Ni/CsCu <sub>2</sub> I <sub>3</sub> /Ni                                                             | 340             | —                      | —                            | -5       | —                   | 28   |
| Antisolvent            | Ag/CsCu <sub>2</sub> I <sub>3</sub> /Ag                                                             | 350             | 0.052                  | 0.093                        | 3        | 188                 | 29   |
| VTE                    | Au/CsCu <sub>2</sub> I <sub>3</sub>                                                                 | 340             | 0.049                  | 2.49                         | 2        | 3150                | 32   |
| PLD                    | Cs <sub>3</sub> Cu <sub>2</sub> I <sub>5</sub> /n-Si                                                | 280             | 0.0708                 | 0.944                        | -1.3     | 130                 | 33   |
| SC                     | Cs <sub>3</sub> Cu <sub>2</sub> I <sub>5</sub> /n-Si                                                | 200-1200        | 0.13                   | 3.1                          | 0        | ~1×10 <sup>5</sup>  | 34   |
| Solution               | Au/CsCu <sub>2</sub> I <sub>3</sub> /Au                                                             | 325             | 32.3                   | 1.89                         | 5        | 2600                | 35   |
| Antisolvent            | Au/CsCu <sub>2</sub> I <sub>3</sub> /Au                                                             | 265             | 22.1                   | 0.12                         | 3        | 22                  | 38   |
| Antisolvent            | CsCu <sub>2</sub> I <sub>3</sub>                                                                    | 365             | 0.27                   | 6.38×10 <sup>-4</sup>        | 2        | —                   | 39   |
| Antisolvent            | Ga <sub>2</sub> O <sub>3</sub> /CsCu <sub>2</sub> I <sub>3</sub>                                    | 254             | 0.02                   | 1×10 <sup>-5</sup>           | 0        | 1×10 <sup>5</sup>   | 40   |
| SC                     | Cs <sub>3</sub> Cu <sub>2</sub> I <sub>5</sub> /Au                                                  | 200-325         | 17.8                   | 1.12                         | 5        | —                   | 41   |
| SC                     | GaN-Cs <sub>3</sub> Cu <sub>2</sub> I <sub>5</sub>                                                  | 300-370         | 0.28                   | 1.4                          | -6       | 1.2×10 <sup>5</sup> | 42   |
| Antisolvent            | Cs <sub>3</sub> Cu <sub>2</sub> I <sub>5</sub> /ITO                                                 | 265             | 0.0649                 | 0.69                         | 0        | 142                 | 43   |
| SC                     | Cs <sub>3</sub> Cu <sub>2</sub> I <sub>5</sub> /n-Si                                                | 200-1200        | 0.0836                 | 2.1                          | 0        | 3720                | 44   |
| VTE                    | Ga <sub>2</sub> O <sub>3</sub> /Cs <sub>3</sub> Cu <sub>2</sub> I <sub>5</sub>                      | 248             | —                      | 2.4×10 <sup>-4</sup>         | 0        | 5.1×10 <sup>4</sup> | 45   |
| PLD                    | CsCu <sub>2</sub> I <sub>3</sub> /n-Si                                                              | 330             | 0.0071                 | 0.26                         | 0        | 2150                | 46   |
| VTE                    | CsCu <sub>2</sub> I <sub>3</sub> /Ca <sub>2</sub> Nb <sub>3-x</sub> Ta <sub>x</sub> O <sub>10</sub> | 250             | 81.3                   | —                            | -5       | —                   | 47   |
| Antisolvent            | CsCu <sub>2</sub> I <sub>3</sub> /CuI                                                               | 350             | 0.253                  | 0.31                         | 3        | 280                 | 48   |
| SC                     | CsCu <sub>2</sub> I <sub>3</sub> /GaN                                                               | 300-350         | 0.37                   | 18.3                         | 0        | 325                 | 49   |



| <b>Preparation</b> | <b>Device</b>                         | <b>Wavelength</b> | <b>R</b>                  | <b>D*</b>                       | <b>Bias</b> | <b>On/off</b> | <b>Ref.</b> |
|--------------------|---------------------------------------|-------------------|---------------------------|---------------------------------|-------------|---------------|-------------|
| <b>Technology</b>  | <b>Structure</b>                      | <b>(nm)</b>       | <b>(A W<sup>-1</sup>)</b> | <b>(×10<sup>12</sup> Jones)</b> | <b>(V)</b>  | <b>ratio</b>  |             |
| VTE                | CsCu <sub>2</sub> I <sub>3</sub> /GaN | 330-360           | 0.042                     | 0.142                           | 0           | 640           |             |
| PLD                | CsCu <sub>2</sub> I <sub>3</sub> /GaN | 330-360           | 0.0064                    | 0.0548                          | 0           | 1.3           | This        |
| LACVD              | CsCu <sub>2</sub> I <sub>3</sub> /GaN | 330-360           | 0.012                     | 0.0497                          | 0           | 1             | work        |
| SC                 | CsCu <sub>2</sub> I <sub>3</sub> /GaN | 330-360           | 0.014                     | 0.0591                          | 0           | 61            |             |

**Table S3.** Hall parameters of CsCu<sub>2</sub>I<sub>3</sub> and GaN.

| <b>Material</b>                  | <b>Conduction Type</b> | <b>Carrier Concentration<br/>(cm<sup>-3</sup>)</b> | <b>Mobility<br/>(cm<sup>2</sup> Vs<sup>-1</sup>)</b> |
|----------------------------------|------------------------|----------------------------------------------------|------------------------------------------------------|
| GaN                              | n                      | 1.01×10 <sup>18</sup>                              | 200                                                  |
| CsCu <sub>2</sub> I <sub>3</sub> | p                      | 7.87×10 <sup>14</sup>                              | 9                                                    |
